# Supplementary material for: Systematic Analyses of the Role of the Reader Protein of N6-Methyladenosine RNA Methylation, YTH Domain Family 2, in Liver Hepatocellular Carcinoma
Source: Front Mol Biosci. 2020 Dec 2;7:577460. doi: 10.3389/fmolb.2020.577460 (PMC7738478; doi:10.3389/fmolb.2020.577460)
Supplement: Supplementary Table 3 — YTHDF2 co-expression genes in HCC (LinkedOmics). [file Table_3.xlsx]

## Sheet: Sheet1
YTHDF2 co-expression genes in HCC (LinkedOmics).
Query	Statistic	P-value	FDR (BH)		Query – Gene/Site/Protein in given target dataset (dataset with association was performed).
PPP1R8	0.626997	6.32087e-42	6.29622e-38		Signal Strength – Estimate/coefficient/Statistic obtained from respective statistical method used for analysis.
CDC42	0.607703	7.93266e-39	5.26781e-35		P-value – P-value obtained from statistical method.
UTP11L	0.602448	5.09287e-38	2.5365e-34		FDR (BH) – FDR is calculated by BH (Benjamini-Hochberg method).
KPNA6	0.59297	1.33747e-36	5.329e-33		Statistical Method:Pearson Correlation test
ZCCHC17	0.589952	3.70299e-36	1.22952e-32
TAF12	0.588865	5.32906e-36	1.51665e-32
PTP4A2	0.571731	1.38704e-33	3.45407e-30
TXLNA	0.551844	5.94034e-31	1.31493e-27
DNAJC8	0.542448	9.06025e-30	1.80498e-26
USP48	0.524	1.49624e-27	2.70983e-24
TMEM50A	0.514124	2.03069e-26	3.37128e-23
RPA2	0.506156	1.56605e-25	2.39991e-22
STX12	0.503573	3.00245e-25	4.27248e-22
FBXO42	0.501493	5.05057e-25	6.70783e-22
TCEB3	0.500392	6.64102e-25	8.2689e-22
GPN2	0.499361	8.57529e-25	1.00492e-21
SF3A3	0.498875	9.6711e-25	1.0277e-21
TRNAU1AP	0.498821	9.8014e-25	1.0277e-21
KIAA0090	0.498013	1.19613e-24	1.19146e-21
GNL2	0.496118	1.90499e-24	1.8072e-21
AK2	0.492595	4.49113e-24	4.06692e-21
ADPRHL2	0.490164	8.06791e-24	6.98822e-21
DHDDS	0.485764	2.30285e-23	1.91156e-20
PSMB2	0.485062	2.71817e-23	2.16606e-20
SNRNP40	0.480427	8.0508e-23	6.16877e-20
YARS	0.477947	1.42978e-22	1.05497e-19
DDOST	0.47525	2.65603e-22	1.88976e-19
EIF3I	0.473793	3.70278e-22	2.54368e-19
KDM1A	0.473239	4.19974e-22	2.78891e-19
MED18	0.471051	6.89057e-22	4.42819e-19
C1orf144	0.467918	1.39112e-21	8.66059e-19
PHC2	0.465365	2.45347e-21	1.48115e-18
TRAPPC3	0.46417	3.19462e-21	1.87186e-18
SFRS4	0.46077	6.73106e-21	3.83132e-18
PEF1	0.460613	6.96454e-21	3.8541e-18
TOE1	0.458893	1.01199e-20	5.44887e-18
GNB1	0.450454	6.14062e-20	3.2193e-17
C1orf128	0.448599	9.06579e-20	4.63099e-17
TMEM39B	0.4472	1.21447e-19	6.04866e-17
EIF4G3	0.446978	1.27203e-19	6.18084e-17
SFRS13A	0.44331	2.71839e-19	1.28942e-16
SYF2	0.442333	3.32281e-19	1.53947e-16
NOL9	0.440674	4.66473e-19	2.11206e-16
LDLRAP1	0.439828	5.5428e-19	2.45386e-16
NOC2L	0.438658	7.02888e-19	3.04412e-16
DFFA	0.437973	8.07373e-19	3.42223e-16
YRDC	0.434349	1.67283e-18	6.94296e-16
CAP1	0.434006	1.79138e-18	7.28325e-16
HP1BP3	0.432677	2.33401e-18	9.27e-16
GMEB1	0.432593	2.37311e-18	9.27e-16
HDAC1	0.429638	4.25618e-18	1.63061e-15
EXOSC10	0.427912	5.97014e-18	2.2441e-15
TMEM69	0.427151	6.92743e-18	2.55571e-15
CCDC21	0.427049	7.06635e-18	2.55956e-15
CAPZB	0.426913	7.25584e-18	2.58126e-15
EIF2C3	0.426176	8.37594e-18	2.92746e-15
YBX1	0.425956	8.7424e-18	3.00286e-15
TMCO4	0.424638	1.12869e-17	3.81114e-15
SFPQ	0.423419	1.42817e-17	4.72031e-15
SRRM1	0.423357	1.44533e-17	4.72031e-15
FOXJ3	0.422507	1.70211e-17	5.46926e-15
C1orf91	0.420421	2.53755e-17	8.02429e-15
GPATCH3	0.41849	3.66281e-17	1.14016e-14
AKIRIN1	0.418196	3.87262e-17	1.17516e-14
KHDRBS1	0.418168	3.89322e-17	1.17516e-14
ENO1	0.416757	5.08237e-17	1.51121e-14
MTF1	0.416396	5.43968e-17	1.59152e-14
LOC401010	0.416326	5.51225e-17	1.59152e-14
PGD	0.415481	6.46044e-17	1.83864e-14
MRTO4	0.415259	6.73519e-17	1.88984e-14
RPAP2	0.40963	1.91633e-16	5.30238e-14
WASF2	0.405963	3.74711e-16	1.0226e-13
ICMT	0.403697	5.64774e-16	1.52046e-13
NSUN4	0.403497	5.85502e-16	1.55525e-13
TTC4	0.402492	7.01527e-16	1.82018e-13
TARDBP	0.402476	7.03512e-16	1.82018e-13
BTF3L4	0.401385	8.55531e-16	2.18511e-13
EPB41	0.400659	9.74146e-16	2.45657e-13
